# Supplementary material for: QSAR Models for Predicting Five Levels of Cellular Accumulation of Lysosomotropic Macrocycles
Source: Int J Mol Sci. 2019 Nov 26;20(23):5938. doi: 10.3390/ijms20235938 (PMC6928787; doi:10.3390/ijms20235938)
Supplement: Supplementary file 1 [file ijms-20-05938-s001.xlsx]

## Sheet: Training set
		Experimental data
Cpd No*	SMILES	ACCUMULATION
		LC-MS/MS		Imaging
		ACC / %AZI	ACC class	LTR ACC class
ACE	CC(=O)NC1=CC=C(C=C1)O	0	1	1
47	CCC1OC(=O)C(C)C(OC2CC(C)(OC)C(O)C(C)O2)C(C)C(OC2OC(C)CC(C2O)N(C)C)C(C)(CC(C)C(=O)NC(C)C(OCCCNC(C)=O)C1(C)O)OC	0.372802	1	1
45	CCC1OC(=O)C(C)C(O)C(C)C(O)C(C)(CC(C)\C(=N/O)C(C)C(O)C1(C)O)OC	1.49523	1	1
13	CCC1OC(=O)C(C)C(OC2CC(C)(OC)C(O)C(C)O2)C(C)C(OC2OC(C)CC(C2O)N(C)CCCNC(=O)CCCCCCCN)C(C)(O)CC(C)CN(C)C(C)C(O)C1(C)O	3.51712	1	1
OFL	CC1COC2=C3N1C=C(C(=O)C3=CC(=C2N4CCN(CC4)C)F)C(=O)O	5	1	1
11	CCC1OC(=O)C(C)C(OC2CC(C)(OC)C(O)C(C)O2)C(C)C(OC2OC(C)CC(C2O)N(C)CCCNC(C)=O)C(C)(O)CC(C)CN(C)C(C)C(O)C1(C)O	5.28766	1	1
16	CCC1OC(=O)C(C)C(OC2CC(C)(OC)C(O)C(C)O2)C(C)C(OC2OC(C)CC(C2O)N(C)C)C(C)(O)CC(C)CN(C)C(C)C(OCCCNC(C)=O)C1(C)O	7.08413	1	1
10	CCCCC(=O)NCCCN1CC(C)CC(C)(O)C(OC2OC(C)CC(C2O)N(C)C)C(C)C(OC2CC(C)(OC)C(O)C(C)O2)C(C)C(=O)OC(CC)C(C)(O)C(O)C1C	7.23049	1	2
43	CCC1OC(=O)C(C)C(OC2CC(C)(OC)C(O)C(C)O2)C(C)C(OC2OC(C)CC(C2O)N(C)C)C(C)(CC(C)\C(=N/O)C(C)C(OCCCNC(C)=O)C1(C)O)OC	8.85519	1	1
4	CCC1OC(=O)C(C)C(OC2CC(C)(OC)C(O)C(C)O2)C(C)C(OC2OC(C)CC(C2O)N(C)C)C(C)(CC(C)C(=O)NC(C)C(O)C1(C)O)OC	10.0463	1	1
26	CCC1OC(=O)C(C)C(OC2CC(C)(OC)C(O)C(C)O2)C(C)C(OC2OC(C)CC(C2O)N(C)C)C(C)(CC(C)C(=O)C(C)C(OCCCNC(C)=O)C1(C)O)OC	10.7494	1	1
AZAG	CCC1OC(=O)C(C)C(O)C(C)C(O)C(C)(O)CC(C)CN(C)C(C)C(O)C1(C)O	12.9781	1	1
IND	CC1=C(C2=C(N1C(=O)C3=CC=C(C=C3)Cl)C=CC(=C2)OC)CC(=O)O	17	2	1
36	CCC1OC(=O)C(C)C(OC2CC(C)(OC)C(O)C(C)O2)C(C)C(OC2OC(C)CC(C2O)N(C)C)C(C)(O)CC(C)CN2CC(CCNC(C)=O)OC(C2C)C1(C)O	17.0449	2	2
44	CCC1OC(=O)C(C)C(O)C(C)C(OC2OC(C)CC(C2O)N(C)C)C(C)(CC(C)\C(=N/O)C(C)C(O)C1(C)O)OC	17.4596	2	1
ERY	CCC1OC(=O)C(C)C(OC2CC(C)(OC)C(O)C(C)O2)C(C)C(OC2OC(C)CC(C2O)N(C)C)C(C)(O)CC(C)C(=O)C(C)C(O)C1(C)O	18.4958	2	2
ROX	CCC1OC(=O)C(C)C(OC2CC(C)(OC)C(O)C(C)O2)C(C)C(OC2OC(C)CC(C2O)N(C)C)C(C)(O)CC(C)\C(=N/OCOCCOC)C(C)C(O)C1(C)O	25.5956	2	2
TEL	CCC1C2(C(C(C(=O)C(CC(C(C(C(=O)C(C(=O)O1)C)C)OC3C(C(CC(O3)C)N(C)C)O)(C)OC)C)C)N(C(=O)O2)CCCCN4C=C(N=C4)C5=CN=CC=C5)C	28	2	2
24	CCC1OC(=O)C(C)C(OC2CC(C)(OC)C(OCCCNC(C)=O)C(C)O2)C(C)C(OC2OC(C)CC(C2O)N(C)C)C(C)(CC(C)C(=O)C(C)C(O)C1(C)O)OC	30.2966	2	1
CLA	CCC1OC(=O)C(C)C(OC2CC(C)(OC)C(O)C(C)O2)C(C)C(OC2OC(C)CC(C2O)N(C)C)C(C)(CC(C)C(=O)C(C)C(O)C1(C)O)OC	35.3315	2	2
41	CCC1OC(=O)C(C)C(OC2CC(C)(OC)C(O)C(C)O2)C(C)C(OC2OC(C)CC(C2O)N(C)C)C(C)(CC(C)\C(=N/O)C(C)C(O)C1(C)O)OC	47.9085	2	2
3	CCC1OC(=O)C(C)C(O)C(C)C(OC2OC(C)CC(C2O)N(C)C)C(C)(O)CC(C)CN(C)C(C)C(O)C1(C)O	56.1148	2	2
21	CCCCCCCC(=O)NCCCN1CC(C)CC(C)(O)C(O)C(C)C(O)C(C)C(=O)OC(CC)C(C)(O)C(O)C1C	62.8355	2	2
IMI	CN(C)CCCN1C2=CC=CC=C2CCC3=CC=CC=C31	71	3	3
AZI	CCC1OC(=O)C(C)C(OC2CC(C)(OC)C(O)C(C)O2)C(C)C(OC2OC(C)CC(C2O)N(C)C)C(C)(O)CC(C)CN(C)C(C)C(O)C1(C)O	100	3	3
39	CCCCCCCC(=O)NCCCN(C)C1CC(C)OC(OC2C(C)C(O)C(C)C(=O)OC(CC)C(C)(O)C(O)C(C)C(=O)C(C)CC2(C)OC)C1O	106.289	3	2
AMIT	CN(C)CCC=C1C2=CC=CC=C2CCC3=CC=CC=C31	114	3	3
18	CCCCCCCC(=O)NCCCCNC(=O)OC1C(C)N(C)CC(C)CC(C)(O)C(OC2OC(C)CC(C2O)N(C)C)C(C)C(OC2CC(C)(OC)C(O)C(C)O2)C(C)C(=O)OC(CC)C1(C)O	120.783	3	4
8	CCC1OC(=O)C(C)C(OC2CC(C)(OC)C(OC(=O)CN(CC)CC)C(C)O2)C(C)C(OC2OC(C)CC(C2O)N(C)C)C(C)(CC(C)C(=O)NC(C)C(O)C1(C)O)OC	120.965	3	3
48	CCCCCCCC(=O)NCCCOC1C(C)OC(CC1(C)OC)OC1C(C)C(OC2OC(C)CC(C2O)N(C)C)C(C)(CC(C)C(=O)NC(C)C(O)C(C)(O)C(CC)OC(=O)C1C)OC	129.708	3	3
40	CCCCCCCC(=O)NCCCOC1C(C)C(=O)C(C)CC(C)(OC)C(OC2OC(C)CC(C2O)N(C)C)C(C)C(O)C(C)C(=O)OC(CC)C1(C)O	139.811	3	3
CHL	CCN(CC)CCCC(C)NC1=C2C=CC(=CC2=NC=C1)Cl	150	3	4
46	CCCCCCCC(=O)NCCCOC1C(C)NC(=O)C(C)CC(C)(OC)C(OC2OC(C)CC(C2O)N(C)C)C(C)C(OC2CC(C)(OC)C(O)C(C)O2)C(C)C(=O)OC(CC)C1(C)O	162.781	3	3
6	CCCCCCCC(=O)NCCCN1CC(C)CC(C)(O)C(OC2OC(C)CC(C2O)N(C)C)C(C)C(OC2CC(C)(OC)C(O)C(C)O2)C(C)C(=O)OC(CC)C(C)(O)C(O)C1C	207.176	4	4
20	CCCCCCCC(=O)NCCCN(C)C1CC(C)OC(OC2C(C)C(O)C(C)C(=O)OC(CC)C(C)(O)C(O)C(C)N(C)CC(C)CC2(C)O)C1O	225.622	4	4
37	CCCCCCCC(=O)NCCCOC1C(OC2C(C)C(O)C(C)C(=O)OC(CC)C(C)(O)C(O)C(C)N(C)CC(C)CC2(C)O)OC(C)CC1N(C)C	245.383	4	4
25	CCCCCCCC(=O)NCCCOC1C(C)OC(CC1(C)OC)OC1C(C)C(OC2OC(C)CC(C2O)N(C)C)C(C)(CC(C)C(=O)C(C)C(O)C(C)(O)C(CC)OC(=O)C1C)OC	281.125	4	4
FLU	CNCCC(C1=CC=CC=C1)OC2=CC=C(C=C2)C(F)(F)F	357	4	4
23	CCCCCCCC(=O)NCCCN(C)C1CC(C)OC(OC2C(C)C(OC3CC(C)(OC)C(O)C(C)O3)C(C)C(=O)OC(CC)C(C)(O)C(O)C(C)C(=O)C(C)CC2(C)OC)C1O	363.026	4	4
AMIO	CCCCC1=C(C2=CC=CC=C2O1)C(=O)C3=CC(=C(C(=C3)I)OCCN(CC)CC)I	426	4	4
7	CCCCCCCC(=O)NCCCN(C)C1CC(C)OC(OC2C(C)C(OC3CC(C)(OC)C(O)C(C)O3)C(C)C(=O)OC(CC)C(C)(O)C(O)C(C)N(C)CC(C)CC2(C)O)C1O	456.639	5	5
42	CCCCCCCC(=O)NCCCOC1C(C)\C(=N\O)C(C)CC(C)(OC)C(OC2OC(C)CC(C2O)N(C)C)C(C)C(OC2CC(C)(OC)C(O)C(C)O2)C(C)C(=O)OC(CC)C1(C)O	510.466	5	4
34	CCCCCCCC(=O)NCCCOC1C(C)C(OC2OC(C)CC(C2O)N(C)C)C(C)(O)CC(C)CN(C)C(C)C(O)C(C)(O)C(CC)OC(=O)C1C	516.029	5	5
27	CCCCCCCC(=O)NCCCOC1C(C)C(=O)C(C)CC(C)(OC)C(OC2OC(C)CC(C2O)N(C)C)C(C)C(OC2CC(C)(OC)C(O)C(C)O2)C(C)C(=O)OC(CC)C1(C)O	574.596	5	4
33	CCCCCCCC(=O)NCCCOC1C(C)N(C)CC(C)CC(C)(O)C(OC2OC(C)CC(C2O)N(C)C)C(C)C(O)C(C)C(=O)OC(CC)C1(C)O	597.5	5	5
31	CCCCCCCC(=O)NCCCOC1C(OC2C(C)C(OC3CC(C)(OC)C(O)C(C)O3)C(C)C(=O)OC(CC)C(C)(O)C(O)C(C)N(C)CC(C)CC2(C)O)OC(C)CC1N(C)C	959.62	5	5
35	CCCCCCCC(=O)NCCC1CN2CC(C)CC(C)(O)C(OC3OC(C)CC(C3O)N(C)C)C(C)C(OC3CC(C)(OC)C(O)C(C)O3)C(C)C(=O)OC(CC)C(C)(O)C(O1)C2C	1061.67	5	5
*Cpd No from Stepanic et al. 2011
Standards from Sanchez Garcia et al. 2018

## Sheet: Validation set
			Experimental data
			ACCUMULATION
			LC-MS/MS
	Cpd No.*	SMILES	ACC / %AZI	ACC class
Stepanic et al. 2011	9	CCC1OC(=O)C(C)C(OC2CC(C)(OC)C(O)C(C)O2)C(C)C(OC2OC(C)CC(C2O)N(C)C)C(C)(O)CC(C)CN(CCCNC(C)=O)C(C)C(O)C1(C)O	0.793123	1
	12	CCCCC(=O)NCCCN(C)C1CC(C)OC(OC2C(C)C(OC3CC(C)(OC)C(O)C(C)O3)C(C)C(=O)OC(CC)C(C)(O)C(O)C(C)N(C)CC(C)CC2(C)O)C1O	75.0832	3
	14	CCC1OC(=O)C(C)C(OC2CC(C)(OC)C(OCCCNC(C)=O)C(C)O2)C(C)C(OC2OC(C)CC(C2O)N(C)C)C(C)(O)CC(C)CN(C)C(C)C(O)C1(C)O	5.98356	1
	15	CCCCCCCC(=O)NCCCOC1C(C)OC(CC1(C)OC)OC1C(C)C(OC2OC(C)CC(C2O)N(C)C)C(C)(O)CC(C)CN(C)C(C)C(O)C(C)(O)C(CC)OC(=O)C1C	356.58	4
	17	CCCCCCCC(=O)NCCCOC1C(C)N(C)CC(C)CC(C)(O)C(OC2OC(C)CC(C2O)N(C)C)C(C)C(OC2CC(C)(OC)C(O)C(C)O2)C(C)C(=O)OC(CC)C1(C)O	755.612	5
	19	CCCCCCCC(=O)NCCCN1CC(C)CC(C)(O)C(OC2OC(C)CC(C2O)N(C)C)C(C)C(O)C(C)C(=O)OC(CC)C(C)(O)C(O)C1C	79.9024	3
	22	CCC1OC(=O)C(C)C(OC2CC(C)(OC)C(O)C(C)O2)C(C)C(OC2OC(C)CC(C2O)N(C)CCCNC(C)=O)C(C)(CC(C)C(=O)C(C)C(O)C1(C)O)OC	26.6559	2
	30	CCC1OC(=O)CC(O)C(C)C(OC2OC(C)C(OC3CC(C)(O)C(O)C(C)O3)C(C2O)N(C)C)C(CC=O)CC(C)C(=O)\C=C\C(C)=C\C1COC1OC(C)C(O)C(OC)C1OC	6.3222	1
	32	CCC1OC(=O)C(C)C(OC2CC(C)(OC)C(O)C(C)O2)C(C)C(OC2OC(C)CC(C2OCCCNC(C)=O)N(C)C)C(C)(O)CC(C)CN(C)C(C)C(O)C1(C)O	13.6474	1
	38	CCCCCCCC(=O)NCCCOC1C(C)N(C)CC(C)CC(C)(O)C(O)C(C)C(O)C(C)C(=O)OC(CC)C1(C)O	284.84	4
Kostrun et al. 2017	T19	CCC1OC(=O)C(C)C(OC2CC(C)(OC)C(O)C(C)O2)C(C)C(OC2OC(C)CC(C2O)N(C)C)C(C)(O)CC(C)CN(CCCNC(=O)CC)C(C)C(O)C1(C)O	0	1
	T12	CCC1OC(=O)C(C)C(OC2CC(C)(OC)C(O)C(C)O2)C(C)C(OC2OC(C)CC(C2OCCCNC(=O)C2CCC2)N(C)C)C(C)(O)CC(C)CN(C)C(C)C(O)C1(C)O	124	3
	T13	CCC1OC(=O)C(C)C(OC2CC(C)(OC)C(OCCCNC(=O)COC)C(C)O2)C(C)C(OC2OC(C)CC(C2O)N(C)C)C(C)(O)CC(C)CN(C)C(C)C(O)C1(C)O	9	1
	T14	CCC1OC(=O)C(C)C(OC2CC(C)(OC)C(OCCCNC(=O)C3CCC3)C(C)O2)C(C)C(OC2OC(C)CC(C2O)N(C)C)C(C)(O)CC(C)CN(C)C(C)C(O)C1(C)O	51	2
	T15	CCC1OC(=O)C(C)C(OC2CC(C)(OC)C(OCCCNC(=O)c3c(C)nn(C)c3Cl)C(C)O2)C(C)C(OC2OC(C)CC(C2O)N(C)C)C(C)(O)CC(C)CN(C)C(C)C(O)C1(C)O	60	2
	T16	CCC1OC(=O)C(C)C(OC2CC(C)(OC)C(O)C(C)O2)C(C)C(OC2OC(C)CC(C2O)N(C)C)C(C)(O)CC(C)CN(C)C(C)C(OCCCNC(=O)COC)C1(C)O	26	2
	T17	CCC1OC(=O)C(C)C(OC2CC(C)(OC)C(O)C(C)O2)C(C)C(OC2OC(C)CC(C2O)N(C)C)C(C)(O)CC(C)CN(C)C(C)C(OCCCNC(=O)C2CCC2)C1(C)O	138	3
	T18	CCC1OC(=O)C(C)C(OC2CC(C)(OC)C(O)C(C)O2)C(C)C(OC2OC(C)CC(C2O)N(C)C)C(C)(O)CC(C)CN(C)C(C)C(OCCCNC(=O)c2c(C)nn(C)c2Cl)C1(C)O	51	2
	T20	CCC1OC(=O)C(C)C(OC2CC(C)(OC)C(O)C(C)O2)C(C)C(OC2OC(C)CC(C2O)N(C)C)C(C)(O)CC(C)CN(CCCNC(=O)C2CCC2)C(C)C(O)C1(C)O	0	1
	T21	CCC1OC(=O)C(C)C(OCCCNC(=O)COC)C(C)C(OC2OC(C)CC(C2O)N(C)C)C(C)(O)CC(C)CN(C)C(C)C(O)C1(C)O	14	1
	T22	CCC1OC(=O)C(C)C(OCCCNC(=O)C2CCC2)C(C)C(OC2OC(C)CC(C2O)N(C)C)C(C)(O)CC(C)CN(C)C(C)C(O)C1(C)O	21	2
	V14	CCC1OC(=O)C(C)C(OC2OC(C)C(O)C(C)(OC)C2)C(C)C(OC2OC(C)CC(N(C)C)C2OCCCNC(=O)CC)C(C)(O)CC(C)CN(C)C(C)C(O)C1(C)O	41	2
	V15	CCC1OC(=O)C(C)C(OC2CC(C)(OC)C(O)C(C)O2)C(C)C(OC2OC(C)CC(C2OCCCNC(=O)COC)N(C)C)C(C)(O)CC(C)CN(C)C(C)C(O)C1(C)O	22	2
	V16	CCC1OC(=O)C(C)C(OC2CC(C)(OC)C(O)C(C)O2)C(C)C(OC2OC(C)CC(C2OCCCNC(=O)c2c(C)nn(C)c2Cl)N(C)C)C(C)(O)CC(C)CN(C)C(C)C(O)C1(C)O	95	3
	V17	CCC1OC(=O)C(C)C(OC2CC(C)(OC)C(OCCCNC(=O)CC)C(C)O2)C(C)C(OC2OC(C)CC(C2O)N(C)C)C(C)(O)CC(C)CN(C)C(C)C(O)C1(C)O	15	2
	V18	CCC1OC(=O)C(C)C(OC2CC(C)(OC)C(O)C(C)O2)C(C)C(OC2OC(C)CC(C2O)N(C)C)C(C)(O)CC(C)CN(C)C(C)C(OCCCNC(=O)CC)C1(C)O	41	2
	V19	CCC1OC(=O)C(C)C(OC2CC(C)(OC)C(O)C(C)O2)C(C)C(OC2OC(C)CC(C2O)N(C)C)C(C)(O)CC(C)CN(CCCNC(=O)COC)C(C)C(O)C1(C)O	2	1
	V20	CCC1OC(=O)C(C)C(OC2CC(C)(OC)C(O)C(C)O2)C(C)C(OC2OC(C)CC(C2O)N(C)C)C(C)(O)CC(C)CN(CCCNC(=O)c2c(C)nn(C)c2Cl)C(C)C(O)C1(C)O	5	1
	V21	CCC1OC(=O)C(C)C(OCCCNC(=O)CC)C(C)C(OC2OC(C)CC(C2O)N(C)C)C(C)(O)CC(C)CN(C)C(C)C(O)C1(C)O	22	2
	V22	CCC1OC(=O)C(C)C(OCCCNC(=O)c2c(C)nn(C)c2Cl)C(C)C(OC2OC(C)CC(C2O)N(C)C)C(C)(O)CC(C)CN(C)C(C)C(O)C1(C)O	59	2
* Cpd No. From Stepanic et al. 2011 or Kostrun et al. 2017

## Sheet: Standards legend
STANDARDS
ACE	Acetamnophen	non-macrocycle
OFL	Ofloxacin	non-macrocycle
AZAG	Azithromycin Aglycon	macrocycle
IND	Indomethacin	non-macrocycle
ERY	Erythromycin	macrocycle
ROX	Roxithromycin	macrocycle
TEL	Telithromycin	macrocycle
CLA	Clarithromycin	macrocycle
IMI	Imipramine	non-macrocycle
AZI	Azithromycin	macrocycle
AMIT	Amitriptyline	non-macrocycle
CHL	Chloroquine	non-macrocycle
FLU	Fluoxetine	non-macrocycle
AMIO	Amiodarone	non-macrocycle

## Sheet: Descriptors and coefficients
		Model coefficients
Descriptor	Description	Predicted LTR ACC Class - OPLS Model 1	No LTR ACC Class - OPLS Model 2	LTR ACC Class - OPLS Model 3
LTR_ACC_class	predicted by model 3 or experimantal data	0.591082
Chi0	Kier and Hall molecular connectivity index	0.00138091	0.01597	0.0152168
Chi0n	Kier and Hall molecular connectivity index	0.0109192	0.0223075	0.0260728
Chi0v	Kier and Hall molecular connectivity index	0.00499405	0.0226861	0.0228894
Chi1	Kier and Hall molecular connectivity index	0.00578343	0.0206041	0.0201442
Chi1n	Kier and Hall molecular connectivity index	0.0199948	0.0318646	0.0400681
Chi1v	Kier and Hall molecular connectivity index	0.0149644	0.0323139	0.0374808
Chi2n	Kier and Hall molecular connectivity index	0.0173524	0.0218035	0.0324156
Chi2v	Kier and Hall molecular connectivity index	0.0111496	0.0222581	0.029251
Chi3n	Kier and Hall molecular connectivity index	0.0166826	0.0172528	0.0225372
Chi3v	Kier and Hall molecular connectivity index	0.0107232	0.0175653	0.0190527
Chi4n	Kier and Hall molecular connectivity index	0.0207868	0.0167205	0.0240364
Chi4v	Kier and Hall molecular connectivity index	0.00952861	0.0171552	0.0171273
EState_VSA1	van der waals surface binned by Kier and Hall electrotopological state index	-0.0272912	-0.0264663	-0.0285994
EState_VSA2	van der waals surface binned by Kier and Hall electrotopological state index	0.0492394	-0.00495562	-0.00708556
EState_VSA3	van der waals surface binned by Kier and Hall electrotopological state index	0.0520854	0.0456931	0.0410072
EState_VSA4	van der waals surface binned by Kier and Hall electrotopological state index	0.063922	0.146493	0.178965
EState_VSA5	van der waals surface binned by Kier and Hall electrotopological state index	-0.0563964	-0.0330268	-0.10644
EState_VSA6	van der waals surface binned by Kier and Hall electrotopological state index	-0.0332593	-0.0601717	-0.0746237
EState_VSA7	van der waals surface binned by Kier and Hall electrotopological state index	0.024845	0.039372	0.10868
EState_VSA8	van der waals surface binned by Kier and Hall electrotopological state index	-0.0135905	0.064507	0.0213582
EState_VSA9	van der waals surface binned by Kier and Hall electrotopological state index	-0.0335387	-0.033879	-0.0495074
EState_VSA10	van der waals surface binned by Kier and Hall electrotopological state index	-0.020876	0.00272992	0.0118967
EState_VSA11	van der waals surface binned by Kier and Hall electrotopological state index	-0.0199534	-0.0144876	-0.0207516
FractionCSP3	fraction of sp3 carbon atoms	0	0	0
HallKierAlpha	Kier and Hall shape index	0.0287387	0.0487669	0.0908196
HeavyAtomCount	sum of non-hydrogen atoms	0.00370239	0.017859	0.0176788
Ipc	information for polynomial coefficients based information theory index	0.0515466	0.0198064	0.0447538
Kappa1	Kier and Hall shape index	0.00249727	0.0233999	0.023113
Kappa2	Kier and Hall shape index	0.0159117	0.0467037	0.0485498
Kappa3	Kier and Hall shape index	0.0133811	0.0547466	0.0651521
LabuteASA	approximate surface area	0.00213811	0.0212548	0.0198586
MolLogP	logP	0.154044	0.163836	0.206348
MolMR	molecular refractive index	0.00684089	0.029352	0.0292802
MolWt	molecular weight	-0.011625	0.0173433	0.00787652
NHOHCount	Sum of NH and OH groups	-0.130607	-0.0298181	-0.0637056
NOCount	Sum of N and O atoms	-0.0304278	-0.0295337	-0.041481
NumAliphaticCarbocycles	Number of aliphatic carbon rings	-0.065889	0.00274483	-0.0565559
NumAliphaticHeterocycles	Number of aliphatic heterocyclic rings	0.0498979	-0.0227556	0.00256892
NumAliphaticRings	Number of aliphatic rings	0.0426826	-0.0231336	-0.00494578
NumAromaticCarbocycles	Number of aromatic carbon rings	-0.0117859	0.0197745	-0.0135665
NumAromaticHeterocycles	Number of aromatic heterocyclic rings	-0.0357963	-0.0412047	-0.00875011
NumAromaticRings	Number of aromatic rings	-0.0249362	-0.00399086	-0.0140157
NumHAcceptors	Number of hydrogen bond acceptors	-0.0192359	-0.0252493	-0.03195
NumHDonors	Number of hydrogen bond donors	-0.0988659	-0.0212421	-0.0385843
NumHeteroatoms	Number of hetero (non-carbon) atoms	-0.0382318	-0.0269213	-0.038181
NumRotatableBonds	Number of rotatable bonds	0.0445225	0.087249	0.0853496
NumSaturatedCarbocycles	Number of saturated carbon rings	0	0	0
NumSaturatedHeterocycles	Number of saturated heterocyclic rings	0.0298386	-0.0180394	0.00731511
NumSaturatedRings	Number of saturated rings	0.0298386	-0.0180394	0.00731511
PEOE_VSA1	van der waals surface binned by partial atomic charges	-0.0213246	-0.0209749	-0.0313389
PEOE_VSA2	van der waals surface binned by partial atomic charges	-0.0423723	-0.0299534	-0.05374
PEOE_VSA3	van der waals surface binned by partial atomic charges	-0.0329999	-0.0612628	-0.000763308
PEOE_VSA4	van der waals surface binned by partial atomic charges	-0.0394709	0.0618182	0.0933009
PEOE_VSA5	van der waals surface binned by partial atomic charges	0	0	0
PEOE_VSA6	van der waals surface binned by partial atomic charges	0.216347	0.197159	0.242027
PEOE_VSA7	van der waals surface binned by partial atomic charges	-0.0642107	0.0359824	0.0491719
PEOE_VSA8	van der waals surface binned by partial atomic charges	-0.0826373	-0.030864	-0.0801702
PEOE_VSA9	van der waals surface binned by partial atomic charges	0.00279659	-0.0332516	-0.048334
PEOE_VSA10	van der waals surface binned by partial atomic charges	0.0130252	-0.0126276	-0.0205696
PEOE_VSA11	van der waals surface binned by partial atomic charges	-0.0105443	-0.0431038	-0.00764698
PEOE_VSA12	van der waals surface binned by partial atomic charges	-0.0427057	-0.0365418	-0.119839
PEOE_VSA13	van der waals surface binned by partial atomic charges	0.103523	-0.00441077	-0.0237086
PEOE_VSA14	van der waals surface binned by partial atomic charges	0.0176598	-0.0121321	0.0654698
RingCount	Total number of rings	0.0306263	-0.0357854	-0.0220764
SMR_VSA1	van der waals surface binned by molecular refractive index	-0.014305	-0.0211334	-0.0351728
SMR_VSA2	van der waals surface binned by molecular refractive index	0	0	0
SMR_VSA3	van der waals surface binned by molecular refractive index	-0.063536	0.0034176	0.0464912
SMR_VSA4	van der waals surface binned by molecular refractive index	-0.0539349	-0.0208242	-0.0671716
SMR_VSA5	van der waals surface binned by molecular refractive index	0.0338699	0.0358941	0.0579413
SMR_VSA6	van der waals surface binned by molecular refractive index	0.0164275	0.00495971	-0.00224001
SMR_VSA7	van der waals surface binned by molecular refractive index	-0.0404503	0.0116536	-0.0102726
SMR_VSA8	van der waals surface binned by molecular refractive index	0	0	0
SMR_VSA9	van der waals surface binned by molecular refractive index	0.0159237	-0.0273414	-0.008491
SMR_VSA10	van der waals surface binned by molecular refractive index	-0.065114	-0.0339523	-0.121704
SlogP_VSA1	van der waals surface binned by logP	-0.162234	-0.0499081	-0.14809
SlogP_VSA2	van der waals surface binned by logP	-0.00701559	-0.00990401	0.000542464
SlogP_VSA3	van der waals surface binned by logP	-0.0155984	-0.0209849	-0.0609121
SlogP_VSA4	van der waals surface binned by logP	0.012277	-0.0130953	-0.0515481
SlogP_VSA5	van der waals surface binned by logP	0.0668437	0.0724303	0.0944145
SlogP_VSA6	van der waals surface binned by logP	-0.0570708	0.0124813	-0.00179028
SlogP_VSA7	van der waals surface binned by logP	0.0101254	0.00160313	0.0584607
SlogP_VSA8	van der waals surface binned by logP	-0.0298529	-0.0349522	-0.0223677
SlogP_VSA9	van der waals surface binned by logP	0	0	0
SlogP_VSA10	van der waals surface binned by logP	0.00729019	0.00586764	0.0525505
SlogP_VSA11	van der waals surface binned by logP	0.0838621	-0.00378254	-0.00722855
SlogP_VSA12	van der waals surface binned by logP	-0.0953725	0.000477843	-0.0506358
TPSA	topological surface area	-0.0582225	-0.035102	-0.0608584
VSA_EState1	rdkit binned alternative to EState_VSA1	0	0	0
VSA_EState2	rdkit binned alternative to EState_VSA2	0	0	0
VSA_EState3	rdkit binned alternative to EState_VSA3	0	0	0
VSA_EState4	rdkit binned alternative to EState_VSA4	0	0	0
VSA_EState5	rdkit binned alternative to EState_VSA5	0	0	0
VSA_EState6	rdkit binned alternative to EState_VSA6	0	0	0
VSA_EState7	rdkit binned alternative to EState_VSA7	0	0	0
VSA_EState8	rdkit binned alternative to EState_VSA8	-0.00314265	0.0368219	0.0604347
VSA_EState9	rdkit binned alternative to EState_VSA9	-0.00760449	-0.00321755	-0.0134864
VSA_EState10	rdkit binned alternative to EState_VSA10	0.00826557	0.00170961	0.0597002
